# Supplementary material
Source: PubMed Central journal article supplement (PMC3590470)
Supplement: supp_jc.2012-3644_12-3644_MM_Tab_7_Supplement_121712.pdf [file supp_jc.2012-3644_12-3644_MM_Tab_7_Supplement_121712.pdf]

## Supplemental Data Information

### Supplemental Materials and Methods

#### WHI-OS and WHI- SHARe

Women's Health Initiative (WHI) represents one of the largest (n=161,808) studies of women's health conducted in the U.S. with two components: (i) a Clinical Trial (CT) component that enrolled and randomized 68,132 women ages 50–79 into at least one of three placebo-control clinical trials (hormone therapy, dietary modification, and calcium/vitamin D); and (ii) an Observational Study (OS) component that enrolled 93,676 women of the same age range into a parallel prospective cohort study(1). The WHI OS is a longitudinal study designed to investigate the association of clinical, socioeconomic, behavioral, and dietary risk factors with the subsequent incidences of health outcomes, which includes T2D and cardiovascular disease. Details regarding the prospective observational study design have been described elsewhere(1, 2). Of the 93,676 postmenopausal women enrolled in the WHI-OS, 82,069 had no history of type 2 diabetes (T2D) at baseline. T2D was self-reported by treatments with diet, oral hypoglycemic agents, or insulin. Incident T2D cases were identified from post-baseline self-reports of first-time use of oral hypoglycemic agents or insulin or from hospitalizations for previously unreported T2D. We followed the principle of risk-set sampling (3) to randomly select controls for each new case from women who remained free of T2D at the time the case was identified during follow-up. We individually matched 1,543 incident cases with 2,170 controls by age ( $\pm 2.5$  years), ethnic group, clinical center (geographic location), time of blood draw ( $\pm 0.10$  h), and length of follow-up. From 1993-1998, 26,045 (17%) women from minority groups were recruited at 40 clinical centers across the U.S. Of the CT and OS minority participants enrolled in WHI, 12,157 (including 8,515 self identified African American and 3,642 self identified Hispanic subjects) who had consented to genetic research were eligible for the NHLBI's WHI SNP Health Association Resource (SHARe) Genome-Wide Association Study (GWAS) project. DNA

was extracted by the Specimen Processing Laboratory at the Fred Hutchinson Cancer research Center (FHCRC) using specimens that were collected at the time of enrollment. Specimens were stored at -80°C(4). The WHI-SHARe cohort originally included 4,477 African American and 1,821 Hispanic American postmenopausal women enrolled in WHI-Clinical Trial (CT) whose self-reported ethnicity was either African American or Hispanic American with raw genotyping data available (909,622 genotypes were produced by the Affymetrix Genome-wide Human SNP Array 6.0, Santa Clara, CA).

### **Tag single nucleotide polymorphism selection, genotyping methods, and quality control (QC)**

In WHI-OS, we implemented a two-stage approach for selecting tag single nucleotide polymorphisms (tagSNPs) for genotyping, which was described elsewhere previously(5, 6). In the first stage, the National Center for Biotechnology Information database SNP (NCBI dbSNP) and the HapMap database were used to conduct a comprehensive review of common genetic variation. A high-density common SNP set covering the *PPARG* gene's exons, introns, 5' and 3' untranslated regions (UTRs), as well as its 30 kb 5' upstream and 30 kb 3' downstream regions was genotyped in 244 samples, i.e., 61 individuals from each ethnic group (African American, European American, Hispanic American, and Asian American) randomly selected from the WHI-OS source population. In second stage, based on linkage disequilibrium (LD) patterns, we selected LD-based 24 tagSNPs that account for most of the genetic variation within the *PPARG* locus across the four ethnic groups and genotyped these in larger WHI-OS matched case-control samples with the TaqMan allelic-discrimination method. After PCR amplification, the end-point fluorescence was read with the Applied Biosystems Primer 7900HT Fast Real-Time PCR instrument and genotypes were attained with the aid of SDS 2.2.2 Allelic Differentiation Software (Applied Biosystems, Foster City, CA). To estimate reproducibility, 138 duplicated samples were randomly selected and genotyped in a blinded fashion.

In WHI-SHARe, we excluded samples on the basis of genotyping failure and quality control (n = 149), relatedness (n = 56), discordance between self-identified race and genetic ancestry (n = 56), and missing phenotypic information (n = 40). In case of related individuals, the relative with the highest call rate was retained, while other family members were excluded.

## Statistical Analysis

In WHI-OS matched case-control sample, we first estimated the minor allele frequencies (MAFs) of the 24 tagSNPs among WHI-OS controls in each ethnic group. We tested for heterogeneity of genotype distributions across ethnicities using the  $\chi^2$  test. Then, single-SNP and haplotype-based analyses of the data based on multivariate logistic regression models were performed to calculate odds ratios (ORs) and 95% confidence intervals (95% CIs) for each genetic variant with T2D risk. Specifically, we made adjustments for potential confounders [body mass index, fasting glucose and insulin levels in logarithmic scale, cigarette smoking (never, past, and current), alcohol intake (never, past, and current), hormone-replacement therapy use (never, past, and current), family history of T2D, and values of the total metabolic equivalent (MET) value from the individual's recreational physical activity per week at baseline] in multivariate and conditional logistic regression models. In addition, we adjusted for the matching factors (age, clinical center, time of blood draw, and ethnicity) in the multivariate logistic regression models.

In WHI-OS matched case-control sample, single-SNP analyses were performed by coding each SNP either as an additive, dominant, or recessive genetic model. Because multiple *PPARG* SNPs are examined simultaneously, correction for multiple testing is needed, and the conventional Bonferroni control of family-wise error rate (FWER) could be overly conservative. A widely used procedure for controlling FDR is the Benjamini-Hochberg (BH) procedure, which is demonstrated to be more powerful than the Bonferroni method that controls FWER(7). In practice, a prudently chosen trade-off is needed

between type I and type II errors when selecting a significance threshold. A *more stringent* significance threshold increases confidence but reduces statistical power, whereas a *less stringent* significance threshold reduces confidence but increases power. In our study, we reported both raw p-values (i.e., without Bonferroni correction) and FDR adjusted P-value using Benjamini and Hochberg procedure (8) in the single-SNP analysis. Although FDR adjusted P-value threshold of 0.05 is typically applied, a *low-stringency* FDR adjusted P-value threshold of 0.25 has also been applied in previous genetic studies (7, 9). In haplotype-based analyses, only haplotypes with estimated frequencies  $\geq 5\%$  were included for analyses. To increase the genomic coverage, we utilized a sliding-window (3-SNP) haplotype-based analysis. For each window, we used an omnibus likelihood ratio test (LRT), which was a  $\chi^2$  test (degrees of freedom = number of haplotypes in a particular window – 1). The LRT compared the two nested logistic regression models: (i) the full model that contains the haplotype covariates with matching factors (age, clinical center, time of blood draw, and ethnicity), body mass index, fasting glucose and insulin levels in logarithmic scale, cigarette smoking, alcohol intake, hormone-replacement therapy use, family history of T2D, and values of total MET, and (ii) the reduced model that does not contain the haplotype covariates, i.e., age, clinical center, time of blood draw, ethnicity, body mass index, fasting glucose and insulin levels in logarithmic scale, cigarette smoking, alcohol intake, hormone-replacement therapy use, family history of T2D, and values of total MET.  $-\log_{10}P > 2.64$  (P-value  $< 0.0023$ ) was used as the global significance threshold using Bonferroni correction for 22 3-SNP window frames. These above haplotype analyses (i.e., omnibus association analysis and association between selected haplotypes) were performed using the SAS HAPPY macro (<http://www.hsph.harvard.edu/faculty/peter-kraft/software/>).

We made adjustment for potential confounders [body mass index, fasting glucose and insulin levels in logarithmic scale, cigarette smoking (never, past, and current), alcohol intake (never, past, and current), hormone-replacement therapy use (never, past, and current), family history of T2D, and values of the total metabolic equivalent (MET) value from the individual's recreational physical activity per week at baseline] in multivariate and conditional logistic regression models. In addition, we adjusted for

the matching factors (age, clinical center, time of blood draw, and ethnicity) in multivariate logistic regression models. Overall, the models had good fit of the data (P-values for LRT of  $\chi^2$  statistics < 0.001). In sliding window-based haplotype-analysis, we assessed interaction effects by ethnicity by fitting a model with haplotype\*ethnicity interaction term. The statistical significance of the association of each SNP with T2D risk was determined using an omnibus LRT, which was a  $\chi^2$  test (degrees of freedom = number of haplotypes in a particular window – 1).

To validate results of WHI-OS, in WHI-SHARe unmatched case-control sample consisting of 5,642 individuals by excluding participants who enrolled in the WHI-OS, only single-SNP analyses of data from the study of WHI-SHARe were performed (given the sparseness of the distribution of the 8 tagSNPs) to obtain OR and associated 95% CI estimates for each SNP under additive, dominant, or recessive genetic model (R, version 2.13) with adjustment for the same set of covariates of WHI-OS, as well as global ancestry using 3 principal components computed with EIGENSTRAT(10). Because cases and controls were not matched within each of the two minority groups, unconditional multivariate logistic regression model was employed. We also performed a statistical analysis of candidate T2D-related pathways (i.e., pathways involved in beta cell function, insulin signaling, leptin, PPAR signaling, signaling of WNT (structurally related genes that encode secreted signaling proteins), glucose transport and metabolism, adipocytokine signaling, glucokinase regulation, triglyceride activity, neuronal activity, inflammatory response, and endothelial activity)(11) using the Gene Set Enrichment Algorithm (GSEA), with the 871,309 SNPs remained after genotype cleaning, provided by the MAGENTA program(12) with adjustment for age, region of clinical center, and global ancestry.

## References:

1. 1998 Design of the Women's Health Initiative clinical trial and observational study. The Women's Health Initiative Study Group. *Control Clin Trials* 19:61-109
2. **Anderson GL, Manson J, Wallace R, Lund B, Hall D, Davis S, Shumaker S, Wang CY, Stein E, Prentice RL** 2003 Implementation of the Women's Health Initiative study design. *Ann Epidemiol* 13:S5-17
3. **Liu S, Tinker L, Song Y, Rifai N, Bonds DE, Cook NR, Heiss G, Howard BV, Hotamisligil GS, Hu FB, Kuller LH, Manson JE** 2007 A prospective study of inflammatory cytokines and diabetes mellitus in a multiethnic cohort of postmenopausal women. *Arch Intern Med* 167:1676-1685
4. **Reiner AP, Lettre G, Nalls MA, Ganesh SK, Mathias R, Austin MA, Dean E, Arepalli S, Britton A, Chen Z, Couper D, Curb JD, Eaton CB, Fornage M, Grant SF, Harris TB, Hernandez D, Kamatini N, Keating BJ, Kubo M, LaCroix A, Lange LA, Liu S, Lohman K, Meng Y, Mohler ER, 3rd, Musani S, Nakamura Y, O'Donnell CJ, Okada Y, Palmer CD, Papanicolaou GJ, Patel KV, Singleton AB, Takahashi A, Tang H, Taylor HA, Jr., Taylor K, Thomson C, Yanek LR, Yang L, Ziv E, Zonderman AB, Folsom AR, Evans MK, Liu Y, Becker DM, Snively BM, Wilson JG** 2011 Genome-wide association study of white blood cell count in 16,388 African Americans: the continental origins and genetic epidemiology network (COGENT). *PLoS Genet* 7:e1002108
5. **Hao K, Liu S, Niu T** 2005 A sparse marker extension tree algorithm for selecting the best set of haplotype tagging single nucleotide polymorphisms. *Genet Epidemiol* 29:336-352
6. **Hsu YH, Niu T, Song Y, Tinker L, Kuller LH, Liu S** 2008 Genetic variants in the UCP2-UCP3 gene cluster and risk of diabetes in the Women's Health Initiative Observational Study. *Diabetes* 57:1101-1107
7. **Goringe KL, George J, Anglesio MS, Ramakrishna M, Etemadmoghadam D, Cowin P, Sridhar A, Williams LH, Boyle SE, Yanaihara N, Okamoto A, Urashima M, Smyth GK, Campbell IG, Bowtell DD, Australian Ovarian Cancer S** 2010 Copy number analysis identifies novel interactions between genomic loci in ovarian cancer. *PLoS One* 5:e11408
8. **Benjamini Y, Hochberg Y** 1995 Controlling the false discovery rate: a practical and powerful approach to multiple testing. *J R Stat Soc Series B Methodol* 57:289-300
9. **Wang K, Zhang H, Bloss CS, Duvvuri V, Kaye W, Schork NJ, Berrettini W, Hakonarson H** 2011 A genome-wide association study on common SNPs and rare CNVs in anorexia nervosa. *Mol Psychiatry* 16:949-959
10. **Price AL, Patterson NJ, Plenge RM, Weinblatt ME, Shadick NA, Reich D** 2006 Principal components analysis corrects for stratification in genome-wide association studies. *Nat Genet* 38:904-909
11. **McCarthy MI** 2010 Genomics, type 2 diabetes, and obesity. *N Engl J Med* 363:2339-2350
12. **Segre AV, Groop L, Mootha VK, Daly MJ, Altshuler D** 2010 Common inherited variation in mitochondrial genes is not enriched for associations with type 2 diabetes or related glycemic traits. *PLoS Genet* 6:e1001058

**Supplemental Table 1. Minor allele frequencies (MAFs) of the 24 tagSNPs in the *PPARG* gene.**

| dbSNP ID   | SNP ID | Genome Coordinate <sup>a</sup> | Major/<br>Minor Allele | MAF (%) <sup>b</sup>      |                          |                           |                        |                    | P-value for heterogeneity <sup>c</sup> |
|------------|--------|--------------------------------|------------------------|---------------------------|--------------------------|---------------------------|------------------------|--------------------|----------------------------------------|
|            |        |                                |                        | European American (n=968) | African American (n=754) | Hispanic American (n=282) | Asian American (n=166) | Combined (n=2,170) |                                        |
| rs9878908  | SNP1   | 12242462                       | T/C                    | 0.2022                    | 0.1122                   | 0.1178                    | 0.3302                 | 0.1695             | <.0001                                 |
| rs6798713  | SNP2   | 12245587                       | T/C                    | 0.1812                    | 0.1938                   | 0.1137                    | 0.3282                 | 0.1881             | <.0001                                 |
| rs6809631  | SNP3   | 12275647                       | A/T                    | 0.2607                    | 0.2889                   | 0.3073                    | 0.4785                 | 0.2934             | <.0001                                 |
| rs9817428  | SNP4   | 12280267                       | C/A                    | 0.2593                    | 0.3616                   | 0.3147                    | 0.4697                 | 0.3186             | <.0001                                 |
| rs10510411 | SNP5   | 12286849                       | G/A                    | 0.2603                    | 0.3038                   | 0.3105                    | 0.2638                 | 0.2822             | 0.1039                                 |
| rs12629293 | SNP6   | 12291746                       | A/G                    | 0.2641                    | 0.2293                   | 0.3011                    | 0.2813                 | 0.2581             | 0.0577                                 |
| rs12636454 | SNP7   | 12300214                       | T/C                    | 0.2611                    | 0.2969                   | 0.3032                    | 0.2719                 | 0.2799             | 0.3227                                 |
| rs4518111  | SNP8   | 12317344                       | C/A                    | 0.4033                    | 0.1835                   | 0.3859                    | 0.5123                 | 0.3328             | <.0001                                 |
| rs10510418 | SNP9   | 12328563                       | A/C                    | 0.3259                    | 0.111                    | 0.2744                    | 0.2284                 | 0.2369             | <.0001                                 |
| rs1801282  | SNP10  | 12333125                       | C/G                    | 0.1192                    | 0.0255                   | 0.0655                    | 0.0494                 | 0.0742             | <.0001                                 |
| rs1373640  | SNP12  | 12342601                       | C/T                    | 0.339                     | 0.1198                   | 0.2591                    | 0.1883                 | 0.2403             | <.0001                                 |
| rs2972162  | SNP13  | 12364793                       | C/T                    | 0.5207                    | 0.3351                   | 0.5345                    | 0.4286                 | 0.4505             | <.0001                                 |
| rs10510419 | SNP14  | 12366936                       | G/T                    | 0.1457                    | 0.1159                   | 0.2527                    | 0.0123                 | 0.1391             | <.0001                                 |
| rs2959272  | SNP16  | 12382833                       | C/A                    | 0.5277                    | 0.4158                   | 0.5469                    | 0.4294                 | 0.4837             | <.0001                                 |
| rs709150   | SNP18  | 12391337                       | C/G                    | 0.4721                    | 0.2255                   | 0.4063                    | 0.5648                 | 0.3845             | <.0001                                 |
| rs709157   | SNP19  | 12402024                       | G/A                    | 0.3047                    | 0.0875                   | 0.2364                    | 0.0245                 | 0.1983             | <.0001                                 |
| rs1175540  | SNP20  | 12405243                       | C/A                    | 0.3607                    | 0.6514                   | 0.317                     | 0.4146                 | 0.4607             | <.0001                                 |
| rs1175544  | SNP21  | 12407044                       | C/T                    | 0.3231                    | 0.1292                   | 0.2473                    | 0.3742                 | 0.2495             | <.0001                                 |
| rs1797912  | SNP22  | 12410239                       | A/C                    | 0.3672                    | 0.1523                   | 0.2726                    | 0.4146                 | 0.2846             | <.0001                                 |
| rs1152002  | SNP23  | 12411871                       | G/A                    | 0.4856                    | 0.4298                   | 0.3727                    | 0.4479                 | 0.4486             | 0.0001                                 |
| rs3856806  | SNP24  | 12415557                       | C/T                    | 0.1303                    | 0.0643                   | 0.074                     | 0.1933                 | 0.1047             | <.0001                                 |
| rs1152003  | SNP25  | 12417055                       | C/G                    | 0.3383                    | 0.6171                   | 0.5163                    | 0.5185                 | 0.4725             | <.0001                                 |
| rs1152007  | SNP26  | 12427547                       | C/G                    | 0.3455                    | 0.1808                   | 0.3327                    | 0.4634                 | 0.2955             | <.0001                                 |
| rs709167   | SNP28  | 12442955                       | A/C                    | 0.4601                    | 0.2917                   | 0.4076                    | 0.8025                 | 0.4204             | <.0001                                 |

<sup>a</sup>: Genome coordinate was according to chromosome 3 genomic contig (reference assembly) NT\_022517.18.

<sup>b</sup>: MAF was estimated in the controls only (The minor allele was defined based on the entire control population).

<sup>c</sup>: The P-value was estimated based on a  $\chi^2$  test (d.f. = 6) for genotype distribution across the four ethnicities.

**Supplemental Table 2. Association between the *PPARG* non-synonymous SNP (rs1801282) and T2D risk by genotype<sup>a</sup> in Women’s Health Initiative Observational Study nested case-control sample (n=3,713).**

| <b>Genotype</b>  | <b>European American</b><br>(954/968) <sup>b</sup> | <b>African American</b><br>(369/754) | <b>Hispanic American</b><br>(141/282) | <b>Asian American</b><br>(79/166) | <b>Combined</b><br>(1,543/2,170)   |
|------------------|----------------------------------------------------|--------------------------------------|---------------------------------------|-----------------------------------|------------------------------------|
| <b>rs1801282</b> |                                                    |                                      |                                       |                                   |                                    |
| CC               | 1.00 (ref)                                         | 1.00 (ref)                           | 1.00 (ref)                            | 1.00 (ref)                        | 1.00 (ref)                         |
| CG               | 0.60(0.32-1.14)                                    | 0.59(0.15-2.31)                      | <b>0.17(0.04-0.77)<sup>d</sup></b>    | 0.13(0.01-1.27)                   | <b>0.51(0.31-0.83)<sup>e</sup></b> |
| GG               | 0.58(0.03-10.8)                                    | --- <sup>c</sup>                     | --- <sup>e</sup>                      | --- <sup>c</sup>                  | 0.77(0.07-8.02)                    |

<sup>a</sup>: Adjusted OR (95% CI) for each tagSNP was estimated under the dominant genetic model, using conditional logistic regression models with adjustments for age, body mass index (BMI), ln(fasting insulin), ln(fasting glucose), cigarette smoking (never, past and current), alcohol intake (never, past and current), hormone replacement therapy (HRT) usage (never, past, current), T2D family history (presence/absence), and physical activity per week at baseline. Due to the small Asian population size, BMI, ln(fasting insulin), ln(fasting glucose) were excluded to cause the model to converge.

<sup>b</sup>: Sample size is presented as cases/controls.

<sup>c</sup>: Participants do not possess this genotype.

<sup>d</sup>: P-value = 0.02.

<sup>e</sup>: P-value = 0.006.



**Supplemental Table 3. Single-SNP association studies of the 24 tagSNPs in the *PPARG* gene with T2D risk under dominant genetic model<sup>a</sup> in Women's Health Initiative Observational Study nested case-control sample (n=3,713).**

| dbSNP ID   | European American<br>(954/968) <sup>b</sup> | African American<br>(369/754) | Hispanic American<br>(141/282)     | Asian American<br>(79/166) | Combined<br>(1,543/2,170) | P-value<br>(Combined)   |
|------------|---------------------------------------------|-------------------------------|------------------------------------|----------------------------|---------------------------|-------------------------|
| rs9878908  | 0.89(0.51-1.54)                             | 0.78(0.35-1.76)               | 1.13(0.41-3.10)                    | 1.04(0.53-2.06)            | 0.90(0.62-1.31)           | 0.58                    |
| rs6798713  | 0.74(0.43-1.28)                             | 0.98(0.53-1.80)               | 1.37(0.49-3.82)                    | 1.10(0.55-2.20)            | 0.90(0.64-1.27)           | 0.55                    |
| rs6809631  | 0.71(0.40-1.23)                             | 0.67(0.36-1.22)               | 0.54(0.21-1.35)                    | 0.57(0.25-1.30)            | <b>0.67(0.48-0.95)</b>    | <b>0.03<sup>h</sup></b> |
| rs9817428  | 0.76(0.44-1.31)                             | 0.61(0.34-1.12)               | 0.53(0.21-1.34)                    | 0.55(0.24-1.24)            | <b>0.68(0.48-0.96)</b>    | <b>0.03<sup>i</sup></b> |
| rs10510411 | 0.69(0.40-1.20)                             | 0.63(0.33-1.22)               | 0.69(0.28-1.72)                    | 0.98(0.51-1.88)            | <b>0.65(0.46-0.93)</b>    | <b>0.02<sup>j</sup></b> |
| rs12629293 | 0.69(0.39-1.21)                             | 0.78(0.45-1.36)               | 0.68(0.28-1.65)                    | 0.97(0.51-1.85)            | <b>0.70(0.50-0.98)</b>    | <b>0.04<sup>k</sup></b> |
| rs12636454 | 0.72(0.42-1.24)                             | 0.74(0.43-1.29)               | 0.65(0.27-1.56)                    | 1.08(0.57-2.04)            | <b>0.71(0.51-0.99)</b>    | <b>0.05<sup>l</sup></b> |
| rs4518111  | 1.41(0.78-2.53)                             | 1.15(0.64-2.09)               | 1.73(0.61-4.87)                    | 1.07(0.50-2.27)            | 1.34(0.94-1.90)           | 0.10                    |
| rs10510418 | 1.00(0.60-1.68)                             | 0.68(0.35-1.32)               | 1.23(0.42-3.56)                    | 0.83(0.41-1.64)            | 1.00(0.71-1.40)           | 0.99                    |
| rs1801282  | 0.60(0.32-1.12)                             | 0.59(0.15-2.31)               | <b>0.19(0.04-0.81)<sup>d</sup></b> | 0.21(0.04-1.04)            | <b>0.51(0.32-0.83)</b>    | <b>0.01<sup>m</sup></b> |
| rs1373640  | 1.07(0.65-1.77)                             | 0.83(0.43-1.60)               | 1.77(0.63-4.99)                    | 0.59(0.27-1.28)            | 1.10(0.78-1.54)           | 0.58                    |
| rs2972162  | 0.97(0.51-1.84)                             | 1.09(0.64-1.87)               | 2.02(0.61-6.71)                    | 0.99(0.45-2.16)            | 1.17(0.82-1.68)           | 0.38                    |
| rs10510419 | 1.28(0.68-2.39)                             | 1.13(0.58-2.21)               | 0.87(0.30-2.53)                    | 1.49(0.19-11.5)            | 1.11(0.75-1.64)           | 0.60                    |
| rs2959272  | 0.85(0.44-1.65)                             | 1.03(0.56-1.88)               | 1.62(0.50-5.20)                    | 1.20(0.54-2.66)            | 1.10(0.75-1.60)           | 0.63                    |
| rs709150   | <b>0.43(0.22-0.85)<sup>c</sup></b>          | 0.78(0.43-1.43)               | 1.94(0.58-6.52)                    | 0.93(0.38-2.29)            | 0.75(0.52-1.09)           | 0.13                    |
| rs709157   | 1.29(0.78-2.14)                             | 0.67(0.33-1.39)               | 1.18(0.45-3.06)                    | --- <sup>g</sup>           | 1.04(0.74-1.48)           | 0.81                    |
| rs1175540  | 1.03(0.61-1.73)                             | 0.84(0.33-2.14)               | 1.42(0.55-3.65)                    | 1.17(0.53-2.59)            | 1.12(0.78-1.62)           | 0.54                    |
| rs1175544  | 1.18(0.70-2.00)                             | 0.79(0.40-1.55)               | 1.42(0.53-3.79)                    | 1.20(0.58-2.51)            | 1.18(0.83-1.66)           | 0.36                    |
| rs1797912  | 1.13(0.67-1.92)                             | 0.84(0.45-1.60)               | 1.57(0.56-4.34)                    | 0.96(0.46-1.97)            | 1.16(0.82-1.63)           | 0.41                    |
| rs1152002  | 0.84(0.45-1.57)                             | 0.88(0.49-1.61)               | <b>4.51(1.28-15.9)<sup>e</sup></b> | 0.79(0.39-1.56)            | 1.12(0.78-1.60)           | 0.55                    |
| rs3856806  | 0.94(0.50-1.77)                             | 0.52(0.22-1.22)               | <b>0.22(0.05-0.97)<sup>f</sup></b> | 0.79(0.39-1.59)            | 0.70(0.46-1.07)           | 0.10                    |
| rs1152003  | 1.01(0.59-1.72)                             | 0.75(0.36-1.58)               | 1.77(0.59-5.33)                    | 1.00(0.43-2.32)            | 1.01(0.70-1.45)           | 0.97                    |
| rs1152007  | 1.14(0.64-2.04)                             | 0.76(0.41-1.42)               | 0.99(0.32-3.09)                    | 0.94(0.46-1.93)            | 0.94(0.66-1.35)           | 0.74                    |
| rs709167   | 1.24(0.70-2.21)                             | 1.28(0.70-2.36)               | 2.08 (0.59, 7.37)                  | 0.75(0.17-3.27)            | 1.23(0.85-1.77)           | 0.27                    |

<sup>a</sup>: Adjusted OR (95% CI) for each tagSNP was estimated under the dominant genetic model, using conditional logistic regression models with adjustments for age, body mass index (BMI), ln(fasting insulin), ln(fasting glucose), cigarette smoking (never, past and current), alcohol intake (never, past and current), hormone replacement therapy (HRT) usage (never, past, current), T2D family history (presence/absence), and physical activity per week at baseline. Due to the small Asian population size, BMI, ln(fasting insulin), ln(fasting glucose) were excluded to cause the model to converge.

<sup>b</sup>: Sample size is presented as cases/controls.

<sup>c</sup>: P-value = 0.02, with FDR adjusted P-value = 0.37 using the method of Benjamini and Hochberg.

- <sup>d</sup>: P-value = 0.03, with FDR adjusted P-value = 0.30 using the method of Benjamini and Hochberg.
- <sup>e</sup>: P-value = 0.02, with FDR adjusted P-value = 0.30 using the method of Benjamini and Hochberg.
- <sup>e</sup>: P-value = 0.05, with FDR adjusted P-value = 0.37 using the method of Benjamini and Hochberg.
- <sup>g</sup>: Result is difficult to interpret because of small sample size within strata.
- <sup>h</sup>: P-value = 0.03, with FDR adjusted P-value = 0.16 using the method of Benjamini and Hochberg.
- <sup>i</sup>: P-value = 0.03, with FDR adjusted P-value = 0.16 using the method of Benjamini and Hochberg.
- <sup>j</sup>: P-value = 0.02, with FDR adjusted P-value = 0.16 using the method of Benjamini and Hochberg.
- <sup>k</sup>: P-value = 0.04, with FDR adjusted P-value = 0.18 using the method of Benjamini and Hochberg.
- <sup>l</sup>: P-value = 0.05, with FDR adjusted P-value = 0.18 using the method of Benjamini and Hochberg.
- <sup>m</sup>: P-value = 0.01, with FDR adjusted P-value = 0.16 using the method of Benjamini and Hochberg.

**Supplemental Table 4. Single-SNP association studies of the 24 tagSNPs in the *PPARG* gene with T2D risk under recessive genetic model<sup>a</sup> in Women's Health Initiative Observational Study nested case-control sample (n=3,713).**

| dbSNP ID   | European American<br>(954/968) <sup>b</sup> | African American<br>(369/754) | Hispanic American<br>(141/282) | Asian American<br>(79/166) | Combined<br>(1,543/2,170) | P-value<br>(Combined)   |
|------------|---------------------------------------------|-------------------------------|--------------------------------|----------------------------|---------------------------|-------------------------|
| rs9878908  | 0.59(0.20-1.73)                             | --- <sup>d</sup>              | --- <sup>d</sup>               | 0.91(0.35-2.36)            | 0.71(0.31-1.66)           | 0.43                    |
| rs6798713  | 0.50(0.14-1.79)                             | 0.91(0.17-5.00)               | --- <sup>d</sup>               | 1.07(0.44-2.62)            | 0.72(0.30-1.71)           | 0.45                    |
| rs6809631  | 0.48(0.17-1.34)                             | 0.93(0.33-2.64)               | 0.91(0.18-4.77)                | 0.98(0.45-2.16)            | 0.79(0.44-1.43)           | 0.44                    |
| rs9817428  | 0.54(0.18-1.57)                             | 1.05(0.46-2.39)               | 0.89(0.18-4.32)                | 0.96(0.44-2.08)            | 0.85(0.49-1.47)           | 0.56                    |
| rs10510411 | 0.41(0.14-1.21)                             | 0.49(0.14-1.76)               | 0.91(0.19-4.42)                | 1.43(0.48-4.24)            | 0.55(0.29-1.04)           | 0.07                    |
| rs12629293 | 0.33(0.11-1.01)                             | 0.54(0.14-2.00)               | 0.95(0.19-4.84)                | 1.39(0.47-4.12)            | <b>0.51(0.26-0.99)</b>    | <b>0.05<sup>e</sup></b> |
| rs12636454 | 0.33(0.11-1.02)                             | 0.70(0.26-1.88)               | 1.00(0.20-5.09)                | 1.32(0.46-3.82)            | 0.55(0.30-1.03)           | 0.06                    |
| rs4518111  | 1.66(0.79-3.48)                             | 0.71(0.16-3.16)               | 1.32(0.36-4.87)                | 1.49(0.68-3.29)            | 1.15(0.70-1.87)           | 0.59                    |
| rs10510418 | 1.83(0.70-4.81)                             | 1.08(0.15-7.63)               | 0.38(0.06-2.33)                | --- <sup>d</sup>           | 1.23(0.63-2.41)           | 0.55                    |
| rs1801282  | 0.60(0.03-11.3)                             | --- <sup>d</sup>              | --- <sup>d</sup>               | --- <sup>d</sup>           | 0.79(0.08-8.37)           | 0.85                    |
| rs1373640  | 1.87(0.73-4.76)                             | 0.82(0.15-4.56)               | 0.38(0.06-2.30)                | --- <sup>d</sup>           | 1.27(0.66-2.42)           | 0.48                    |
| rs2972162  | 1.76(0.92-3.39)                             | 1.81(0.75-4.40)               | 0.53(0.16-1.78)                | 0.96(0.36-2.57)            | 1.30(0.85-1.99)           | 0.22                    |
| rs10510419 | <b>14.4(1.71-121)<sup>c</sup></b>           | 4.32(0.58-32.0)               | 1.80(0.16-20.4)                | --- <sup>d</sup>           | <b>3.83(1.15-12.82)</b>   | <b>0.03<sup>f</sup></b> |
| rs2959272  | 1.90(1.00-3.62)                             | 1.40(0.67-2.94)               | 0.58(0.17-2.00)                | 1.00(0.40-2.50)            | 1.35(0.90-2.00)           | 0.14                    |
| rs709150   | 0.87(0.45-1.67)                             | 0.65(0.17-2.45)               | 0.49(0.14-1.67)                | 0.92(0.42-2.03)            | 0.74(0.47-1.17)           | 0.20                    |
| rs709157   | 1.98(0.73-5.43)                             | 0.30(0.02-5.56)               | 0.44(0.07-2.85)                | --- <sup>d</sup>           | 1.34(0.65-2.75)           | 0.43                    |
| rs1175540  | 1.64(0.67-4.02)                             | 1.13(0.65-1.97)               | 0.24(0.04-1.55)                | 1.34(0.52-3.45)            | 1.09(0.71-1.65)           | 0.70                    |
| rs1175544  | 1.67(0.68-4.10)                             | 0.78(0.12-4.97)               | 0.28(0.04-1.94)                | 1.58(0.61-4.12)            | 1.05(0.58-1.90)           | 0.88                    |
| rs1797912  | 1.59(0.69-3.69)                             | 1.07(0.30-3.84)               | 0.33(0.05-2.37)                | 1.07(0.42-2.76)            | 1.16(0.66-2.04)           | 0.61                    |
| rs1152002  | 0.99(0.54-1.83)                             | 1.00(0.47-2.16)               | 0.83(0.18-3.78)                | 0.83(0.32-2.11)            | 1.02(0.67-1.54)           | 0.94                    |
| rs3856806  | 0.46(0.01-23.8)                             | --- <sup>d</sup>              | --- <sup>d</sup>               | 0.83(0.17-4.08)            | 0.62(0.06-6.13)           | 0.68                    |
| rs1152003  | 1.44(0.63-3.34)                             | 1.08(0.62, 1.87)              | 2.43(0.73-8.07)                | 1.02(0.49-2.14)            | 1.21(0.81-1.80)           | 0.35                    |
| rs1152007  | 1.37(0.51-3.65)                             | 0.42(0.10-1.73)               | 1.45(0.28-7.48)                | 0.71(0.32-1.60)            | 0.79(0.43-1.45)           | 0.45                    |
| rs709167   | 0.90(0.47-1.71)                             | 0.64(0.20-2.04)               | 0.51(0.11-2.31)                | 0.85(0.39-1.83)            | 0.86(0.55-1.36)           | 0.53                    |

<sup>a</sup>: Adjusted OR (95% CI) for each tagSNP was estimated under the recessive genetic model, using conditional logistic regression models with adjustments for age, body mass index (BMI), ln(fasting insulin), ln(fasting glucose), cigarette smoking (never, past and current), alcohol intake (never, past and current), hormone replacement therapy (HRT) usage (never, past, current), T2D family history (presence/absence), and physical activity per week at baseline. Due to the small Asian population size, BMI, ln(fasting insulin), ln(fasting glucose) were excluded to cause the model to converge.

<sup>b</sup>: Sample size is presented as cases/controls.

<sup>c</sup>: P-value = 0.01, with FDR adjusted P-value = 0.32 using the method of Benjamini and Hochberg.

<sup>d</sup>: Result is difficult to interpret because of small sample size within strata.

<sup>e</sup>: P-value = 0.05, with FDR adjusted P-value = 0.40 using the method of Benjamini and Hochberg.

<sup>f</sup>: P-value = 0.03, with FDR adjusted P-value = 0.40 using the method of Benjamini and Hochberg.

**Supplemental Table 5. Single-SNP association studies of the 8 tagSNPs in the *PPARG* gene with T2D risk under additive genetic model<sup>a</sup> in Women's Health Initiative SHARe case-control sample (n=5,642).**

| dbSNP ID   | SNP name      | Reference allele | African American (582/3,359) <sup>b</sup> | Hispanic American (241/1,460) <sup>b</sup> | Combined        | P-value (Combined) <sup>c</sup> |
|------------|---------------|------------------|-------------------------------------------|--------------------------------------------|-----------------|---------------------------------|
| rs9878908  | SNP_A-1875778 | C                | 0.74(0.44-1.26)                           | 0.94(0.43-2.02)                            | 0.84(0.55-1.29) | 0.43                            |
| rs9817428  | SNP_A-1949196 | A                | 1.01(0.73-1.39)                           | <b>0.52(0.28-0.96)<sup>e</sup></b>         | 0.88(0.66-1.16) | 0.36                            |
| rs10510418 | SNP_A-1971789 | C                | 1.08(0.66-1.76)                           | 1.04(0.56-1.95)                            | 1.01(0.69-1.46) | 0.97                            |
| rs1801282  | SNP_A-1971790 | G                | 0.81(0.27-2.41)                           | <b>0.25(0.08-0.77)<sup>f</sup></b>         | 0.51(0.24-1.07) | 0.08                            |
| rs2972162  | SNP_A-1946610 | T                | 0.92(0.66-1.28)                           | 1.11(0.65-1.90)                            | 0.99(0.75-1.30) | 0.93                            |
| rs10510419 | SNP_A-4209319 | T                | 0.93(0.56-1.53)                           | 1.87(0.92-3.82)                            | 1.22(0.82-1.81) | 0.33 <sup>f</sup>               |
| rs1175544  | SNP_A-8304334 | T                | 1.11(0.71-1.75)                           | 1.40(0.74-2.63)                            | 1.16(0.81-1.66) | 0.43                            |
| rs1152003  | SNP_A-2140799 | G                | 1.19(0.85-1.65)                           | 0.84(0.51-1.40)                            | 1.08(0.83-1.42) | 0.56                            |

<sup>a</sup>: Adjusted OR (95% CI) for each tagSNP was estimated under the additive genetic model, using logistic regression adjustments for global ancestry (3 PCs), age, ethnicity (combined analysis only), body mass index (BMI), ln(insulin), ln(glucose), cigarette smoking (never, past and current), alcohol intake (never, past and current), hormone replacement therapy (HRT) usage (never, past, current), T2D family history (presence/absence), and physical activity per week at baseline.

<sup>b</sup>: Sample sizes for each ethnic group are presented as cases/controls.

<sup>c</sup>: Ethnic interaction was estimated by fitting a model with ethnicity\*SNP interaction term and adjusting for global ancestry using 3 PCs.

<sup>d</sup>: The likelihood ratio test compared model with SNP versus model without SNP.

<sup>e</sup>: P-value = 0.04, with FDR adjusted P-value = 0.15 using the method of Benjamini and Hochberg.

<sup>f</sup>: P-value = 0.02, with FDR adjusted P-value = 0.12 using the method of Benjamini and Hochberg.

**Supplemental Table 6. Single-SNP association studies of the 8 tagSNPs in the *PPARG* gene with T2D risk under dominant genetic model<sup>a</sup> in Women's Health Initiative SHARe case-control sample (n=5,642).**

| dbSNP ID   | SNP name      | Reference allele | African American (582/3,359) <sup>b</sup> | Hispanic American (241/1,460) <sup>b</sup> | Combined         | P-value (Combined) <sup>c</sup> |
|------------|---------------|------------------|-------------------------------------------|--------------------------------------------|------------------|---------------------------------|
| rs9878908  | SNP_A-1875778 | C                | 0.73(0.41-1.32)                           | 0.85(0.37-1.96)                            | 0.82(0.52-1.31)  | 0.41                            |
| rs9817428  | SNP_A-1949196 | A                | 1.11(0.71-1.74)                           | 0.59(0.28-1.26)                            | 0.97(0.66-1.42)  | 0.88                            |
| rs10510418 | SNP_A-1971789 | C                | 1.09(0.63-1.90)                           | 1.04(0.49-2.23)                            | 1.03(0.67-1.59)  | 0.88                            |
| rs1801282  | SNP_A-1971790 | G                | 0.82(0.27-2.48)                           | <b>0.25(0.08-0.77)<sup>e</sup></b>         | 0.51(0.24-1.08)  | 0.08                            |
| rs2972162  | SNP_A-1946610 | T                | 0.92(0.46-1.86)                           | 1.12(0.45-2.74)                            | 1.02(0.60-1.75)  | 0.93                            |
| rs10510419 | SNP_A-4209319 | T                | --- <sup>f</sup>                          | --- <sup>f</sup>                           | --- <sup>f</sup> | --- <sup>f</sup>                |
| rs1175544  | SNP_A-8304334 | T                | 1.17(0.70-1.97)                           | 1.93(0.89-4.21)                            | 1.33(0.88-2.03)  | 0.18                            |
| rs1152003  | SNP_A-2140799 | G                | 1.05(0.57-1.90)                           | 0.76(0.33-1.72)                            | 0.96(0.60-1.54)  | 0.87                            |

<sup>a</sup>: Adjusted OR (95% CI) for each tagSNP was estimated under the dominant genetic model, using logistic regression adjustments for global ancestry (3 PCs), age, ethnicity (combined analysis only), body mass index (BMI), ln(insulin), ln(glucose), cigarette smoking (never, past and current), alcohol intake (never, past and current), hormone replacement therapy (HRT) usage (never, past, current), T2D family history (presence/absence), and physical activity per week at baseline.

<sup>b</sup>: Sample sizes for each ethnic group are presented as cases/controls.

<sup>c</sup>: Ethnic interaction was estimated by fitting a model with ethnicity\*SNP interaction term and adjusting for global ancestry using 3 PCs.

<sup>d</sup>: The likelihood ratio test compared model with SNP versus model without SNP.

<sup>e</sup>: P-value = 0.02, with FDR adjusted P-value = 0.12 after the method of Benjamini and Hochberg.

<sup>f</sup>: Result is difficult to interpret because of small sample size within strata.

**Supplemental Table 7. Single-SNP association studies of the 8 tagSNPs in the *PPARG* gene with T2D under recessive model<sup>a</sup> in Women's Health Initiative SHARe case-control sample (n=5,642).**

| dbSNP ID   | SNP name      | Reference allele | African American (582/3,359) <sup>b</sup> | Hispanic American (24/1,460) <sup>b</sup> | Combined         | P-value (Combined) <sup>c</sup> |
|------------|---------------|------------------|-------------------------------------------|-------------------------------------------|------------------|---------------------------------|
| rs9878908  | SNP_A-1875778 | C                | 0.53(0.07-4.12)                           | 2.50(0.21-30.0)                           | 0.85(0.18-4.15)  | 0.85                            |
| rs9817428  | SNP_A-1949196 | A                | 0.81(0.40-1.61)                           | <b>0.17(0.03-0.89)<sup>e</sup></b>        | 0.60(0.32-1.11)  | 0.10                            |
| rs10510418 | SNP_A-1971789 | C                | 1.03(0.18-5.96)                           | 1.09(0.22-5.47)                           | 0.85(0.26-2.73)  | 0.78                            |
| rs1801282  | SNP_A-1971790 | G                | --- <sup>f</sup>                          | --- <sup>f</sup>                          | --- <sup>f</sup> | --- <sup>f</sup>                |
| rs2972162  | SNP_A-1946610 | T                | 0.88(0.56-1.38)                           | 1.18(0.52-2.71)                           | 0.96(0.65-1.43)  | 0.86                            |
| rs10510419 | SNP_A-4209319 | T                | 0.85(0.51-1.43)                           | 1.77(0.82-3.81)                           | 1.11(0.73-1.70)  | 0.62                            |
| rs1175544  | SNP_A-8304334 | T                | 0.81(0.16-4.01)                           | 0.30(0.003-3.30)                          | 0.49(0.14-1.76)  | 0.28                            |
| rs1152003  | SNP_A-2140799 | G                | 1.39(0.86-2.22)                           | 0.83(0.36-1.90)                           | 1.24(0.82-1.85)  | 0.31                            |

<sup>a</sup>: Adjusted OR (95% CI) for each tagSNP was estimated under the recessive genetic model, using logistic regression adjustments for global ancestry (3 PCs), age, ethnicity (combined analysis only), body mass index (BMI), ln(insulin), ln(glucose), cigarette smoking (never, past and current), alcohol intake (never, past and current), hormone replacement therapy (HRT) usage (never, past, current), T2D family history (presence/absence), and physical activity per week at baseline.

<sup>b</sup> Sample sizes for each ethnic group are presented as cases/controls.

<sup>c</sup> Ethnic interaction was estimated by fitting a model with ethnicity\*SNP interaction term and adjusting for global ancestry using 3 PCs.

<sup>d</sup> The likelihood ratio test compared model with SNP versus model without SNP.

<sup>e</sup>: P-value = 0.04, with FDR adjusted P-value = 0.29 after the method of Benjamini and Hochberg.

<sup>f</sup> Result is difficult to interpret because of small sample size within strata.



## LONG LIST OF WHI INVESTIGATORS

**Program Office:** (National Heart, Lung, and Blood Institute, Bethesda, Maryland)

Jacques Rossouw, Shari Ludlam, Dale Burwen, Joan McGowan, Leslie Ford, Nancy Geller.

**Clinical Coordinating Center:** (Fred Hutchinson Cancer Research Center, Seattle, WA)

Garnet Anderson, Ross Prentice, Andrea LaCroix, Charles Kooperberg, Barbara Cochrane, Julie Hunt, Marian Neuhouser, Lesley Tinker, Susan Heckbert, Alex Reiner.

**Regional Centers:** (Brigham and Women's Hospital, Harvard Medical School, Boston, MA) JoAnn E. Manson, Kathryn M. Rexrode, Brian Walsh, J. Michael Gaziano, Maria Bueche; (MedStar Health Research Institute/Howard University, Washington, DC) Barbara V. Howard, Lucile Adams-Campbell, Lawrence Lessin, Cheryl Iglesia, Brian Walitt, Amy Park; (The Ohio State University, Columbus, OH) Rebecca Jackson, Randall Harris, Electra Paskett, W. Jerry Mysiw, Michael Blumenfeld; (Stanford Prevention Research Center, Stanford, CA) Marcia L. Stefanick, Mark A. Hlatky, Manisha Desai, Jean Tang, Stacy T. Sims; (University of Arizona, Tucson/Phoenix, AZ) Cynthia A. Thomson, Tamsen Bassford, Cheryl Ritenbaugh, Zhao Chen, Marcia Ko; (University at Buffalo, Buffalo, NY) Jean Wactawski-Wende, Maurizio Trevisan, Ellen Smit, Amy Millen, Michael LaMonte; (University of Florida, Gainesville/Jacksonville, FL) Marian Limacher, Michael Perri, Andrew Kaunitz, R. Stan Williams, Yvonne Brinson; (University of Iowa, Iowa City/Davenport, IA) Robert Wallace, James Torner, Susan Johnson, Linda Snetselaar, Jennifer Robinson; (University of Pittsburgh, Pittsburgh, PA) Lewis Kuller, Jane Cauley, N. Carole Milas; (University of Tennessee Health Science Center, Memphis, TN) Karen C. Johnson, Suzanne Satterfield, Rongling Li, Stephanie Connelly, Fran Tylavsky; (Wake Forest University School of Medicine, Winston-Salem, NC) Sally Shumaker, Stephen Rapp, Claudine Legault, Mark Espeland, Laura Coker, Michelle Naughton.

**Women's Health Initiative Memory Study:** (Wake Forest University School of Medicine, Winston-Salem, NC) Sally Shumaker, Stephen Rapp, Claudine Legault, Mark Espeland, Laura Coker, Michelle Naughton.

**Former Principal Investigators and Project Officers:** (Albert Einstein College of Medicine, Bronx, NY) Sylvia Wassertheil-Smolter (Baylor College of Medicine, Houston, TX) Haleh Sangi-Haghpeykar, Aleksandar Rajkovic, Jennifer Hays, John Foreyt; (Brown University, Providence, RI) Charles B. Eaton, Annlouise R. Assaf; (Emory University, Atlanta, GA) Lawrence S. Phillips, Nelson Watts, Sally McNagny, Dallas Hall.; (Fred Hutchinson Cancer Research Center, Seattle, WA) Shirley A.A. Beresford, Maureen Henderson; (George Washington University, Washington, DC) Lisa Martin, Judith Hsia, Valery Miller; (Harbor-UCLA Research and Education Institute, Torrance, CA) Rowan Chlebowski (Kaiser Permanente Center for Health Research, Portland, OR) Erin LeBlanc, Yvonne Michael, Evelyn Whitlock, Cheryl Ritenbaugh, Barbara Valanis; (Kaiser Permanente Division of Research, Oakland, CA) Bette Caan, Robert Hiatt; (National Cancer Institute, Bethesda, MD) Carolyn Clifford; (Medical College of Wisconsin, Milwaukee, WI) Jane Morley Kotchen (National Heart, Lung, and Blood Institute, Bethesda, Maryland) Linda Pottern; (Northwestern University, Chicago/Evanston, IL) Linda Van Horn, Philip Greenland; (Rush University Medical Center, Chicago, IL) Lynda Powell, William Elliott, Henry Black; (State University of New York at Stony Brook, Stony Brook, NY) Dorothy Lane, Iris Granek; (University at Buffalo, Buffalo, NY) Maurizio Trevisan; (University of Alabama at Birmingham, Birmingham, AL) Cora E. Lewis, Albert Oberman;

(University of Arizona, Tucson/Phoenix, AZ) Tamsen Bassford, Cheryl Ritenbaugh, Tom Moon; (University of California at Davis, Sacramento, CA) John Robbins; (University of California at Irvine, CA) F. Allan Hubbell, Frank Meyskens, Jr.; (University of California at Los Angeles, CA) Lauren Nathan, Howard Judd<sup>1</sup>; (University of California at San Diego, LaJolla/Chula Vista, CA) Robert D. Langer; (University of Cincinnati, Cincinnati, OH) Michael Thomas, Margery Gass, James Liu; (University of Hawaii, Honolulu, HI) J. David Curb<sup>1</sup>; (University of Massachusetts/Fallon Clinic, Worcester, MA) Judith Ockene; (University of Medicine and Dentistry of New Jersey, Newark, NJ) Norman Lasser; (University of Miami, Miami, FL) Mary Jo O'Sullivan, Marianna Baum; (University of Minnesota, Minneapolis, MN) Karen L. Margolis, Richard Grimm; (University of Nevada, Reno, NV) Robert Brunner, Sandra Daugherty<sup>1</sup>; (University of North Carolina, Chapel Hill, NC) Gerardo Heiss, Barbara Hulka, David Sheps; (University of Tennessee Health Science Center, Memphis, TN) Karen Johnson, William Applegate; (University of Texas Health Science Center, San Antonio, TX) Robert Brzyski, Robert Schenken; (University of Wisconsin, Madison, WI) Gloria E. Sarto, Catherine Allen<sup>1</sup>; (Wake Forest University School of Medicine, Winston-Salem, NC) Mara Vitolins, Denise Bonds, Electra Paskett, Greg Burke; (Wayne State University School of Medicine/Karmanos Cancer Institute, Detroit, MI) Michael S. Simon, Susan Hendrix.

<sup>1</sup>deceased<sup>1</sup>
